# Supplementary material for: Whole exome sequencing analysis of canine urothelial carcinomas without BRAF V595E mutation: Short in-frame deletions in BRAF and MAP2K1 suggest alternative mechanisms for MAPK pathway disruption
Source: PubMed Central journal article supplement (PMC10153751; doi:10.1371/journal.pgen.1010575), 2023-04-20
Supplement: pgen.1010575.s003.pdf [file pgen.1010575.s003.pdf]

a) Total number of variants

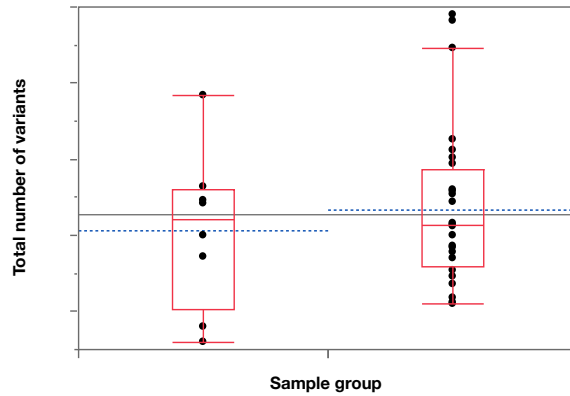

Comparison of means (two-sample t test,  $p = 0.52$ )  
Comparison of variance (two-sided F test,  $p = 1.00$ )

b) Missense variants

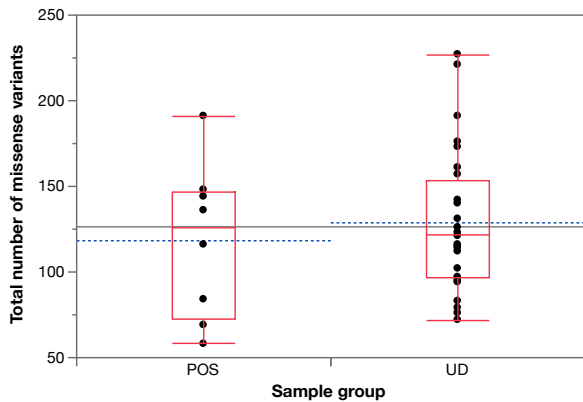

Comparison of means (two-sample t test,  $p = 0.54$ )  
Comparison of variance (two-sided F test,  $p = 0.64$ )

c) In-frame insertions/deletions

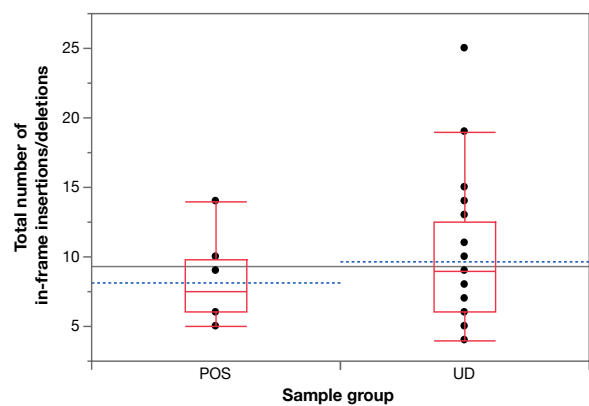

Comparison of means (two-sample t test,  $p = 0.42$ )  
Comparison of variance (two-sided F test,  $p = 0.22$ )

d) Frameshift variants

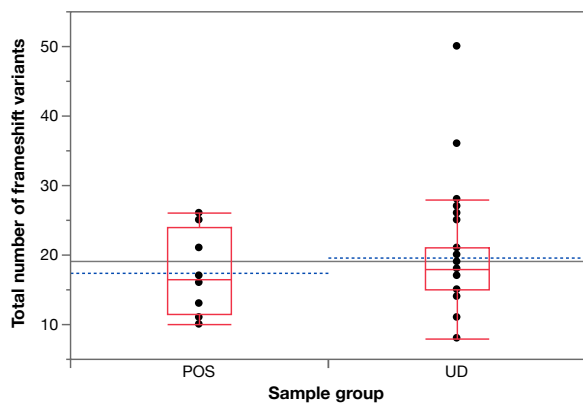

Comparison of means (two-sample t test,  $p = 0.50$ )  
Comparison of variance (two-sided F test,  $p = 0.40$ )

e) Stop gained/lost variants

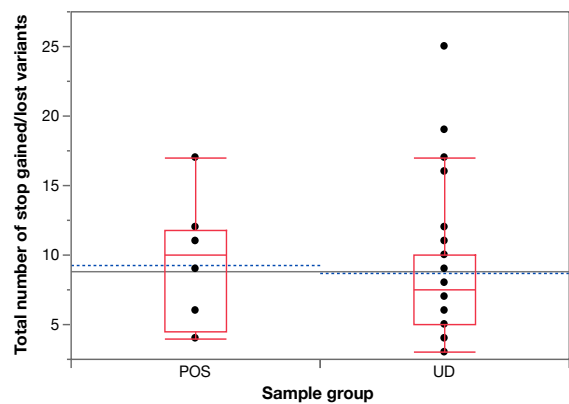

Comparison of means (two-sample t test,  $p = 0.78$ )  
Comparison of variance (two-sided F test,  $p = 0.73$ )
