# Supplementary material for: Whole exome sequencing analysis of canine urothelial carcinomas without BRAF V595E mutation: Short in-frame deletions in BRAF and MAP2K1 suggest alternative mechanisms for MAPK pathway disruption
Source: PubMed Central journal article supplement (PMC10153751; doi:10.1371/journal.pgen.1010575), 2023-04-20
Supplement: pgen.1010575.s005.pdf [file pgen.1010575.s005.pdf]

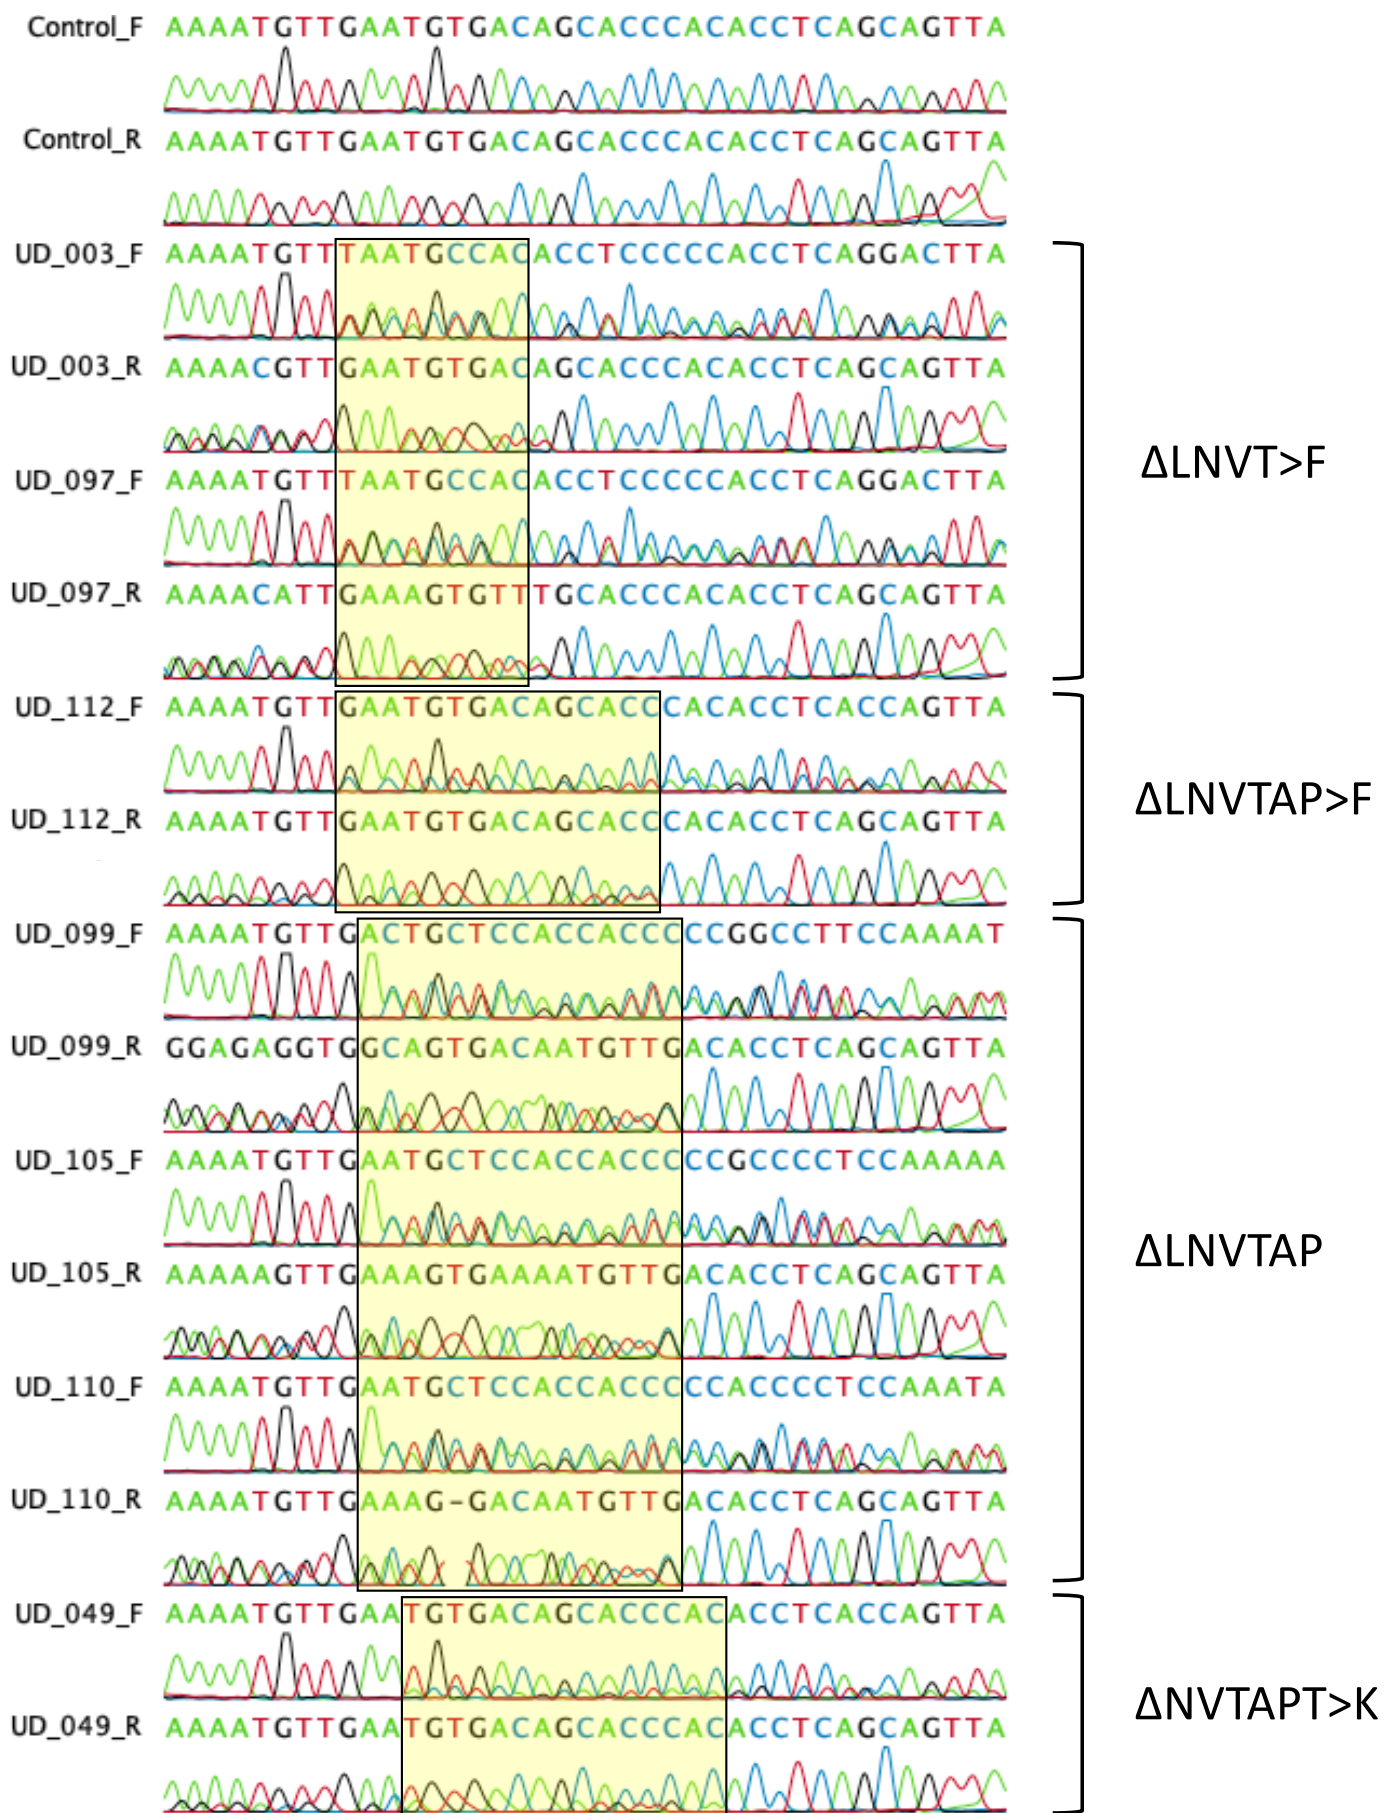

Figure S5
